# Supplementary material for: Three-dimensional Co3O4@C@Ni3S2 sandwich-structured nanoneedle arrays: towards high-performance flexible all-solid-state asymmetric supercapacitors
Source: Royal Society of Chemistry journal article supplement (doi:10.1039/c5ta03469h), 2015-01-01
Supplement: c5ta03469h1.pdf [file c5ta03469h1.pdf]

## Supporting Information

# Three-dimensional $\text{Co}_3\text{O}_4@\text{C}@\text{Ni}_3\text{S}_2$ Sandwich-Structured Nanoneedle Arrays: Towards High-Performance Flexible All-Solid- State Asymmetric Supercapacitors

Dezhi Kong,<sup>ab</sup> Chuanwei Cheng,<sup>\*a</sup> Ye Wang,<sup>b</sup> Jen It Wong,<sup>b</sup> Yaping Yang<sup>a</sup> and Hui Ying Yang<sup>\*b</sup>

*<sup>a</sup>Shanghai Key Laboratory of Special Artificial Microstructure Materials and Technology, School of Physics Science and Engineering, Tongji University, Shanghai 200092, P.R. China,*

*<sup>b</sup>Pillar of Engineering Product Development, Singapore University of Technology and Design, 8 Somapah Road, Singapore 487372*

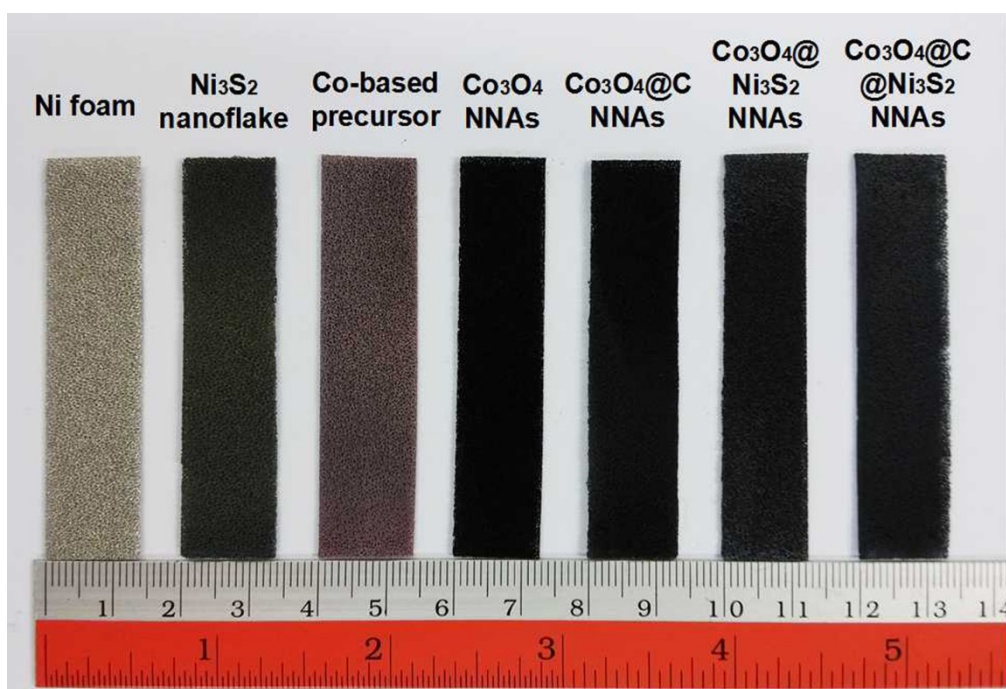

**Figure S1** Photographs of nickel foam substrate, Ni<sub>3</sub>S<sub>2</sub> nanoflakes on Ni foam, Co-based precursor on nickel foam, Co<sub>3</sub>O<sub>4</sub> NNAs on Ni foam, Co<sub>3</sub>O<sub>4</sub>@C NNAs on Ni foam, Co<sub>3</sub>O<sub>4</sub>@Ni<sub>3</sub>S<sub>2</sub> NNAs on Ni foam and Co<sub>3</sub>O<sub>4</sub>@C@Ni<sub>3</sub>S<sub>2</sub> NNAs on Ni foam.

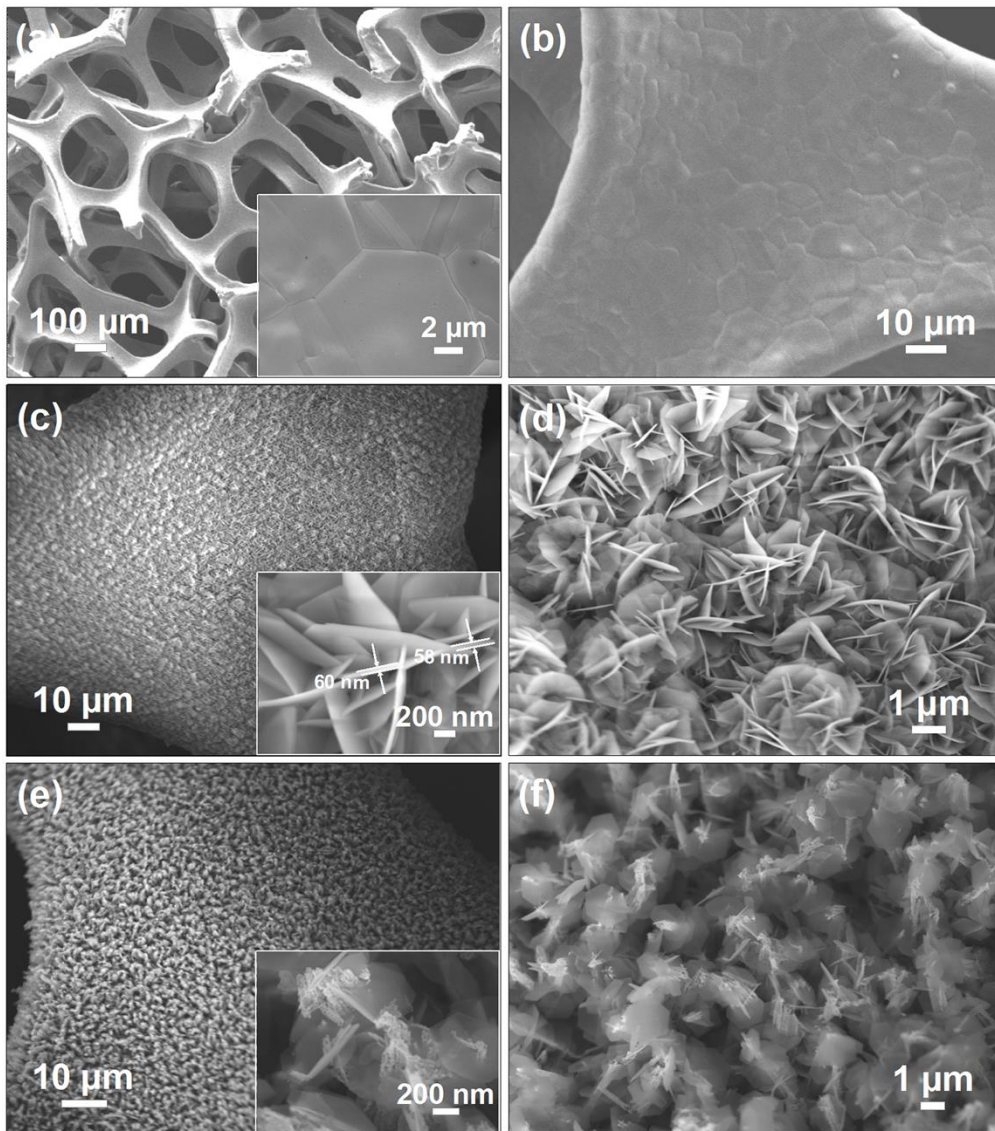

**Figure S2** SEM micrographs of (a, b) pure Ni foam, (c, d) Ni<sub>3</sub>S<sub>2</sub> nanoflakes and (e, f) Co<sub>3</sub>O<sub>4</sub>@Ni<sub>3</sub>S<sub>2</sub> nanoneedle arrays on Ni foam.

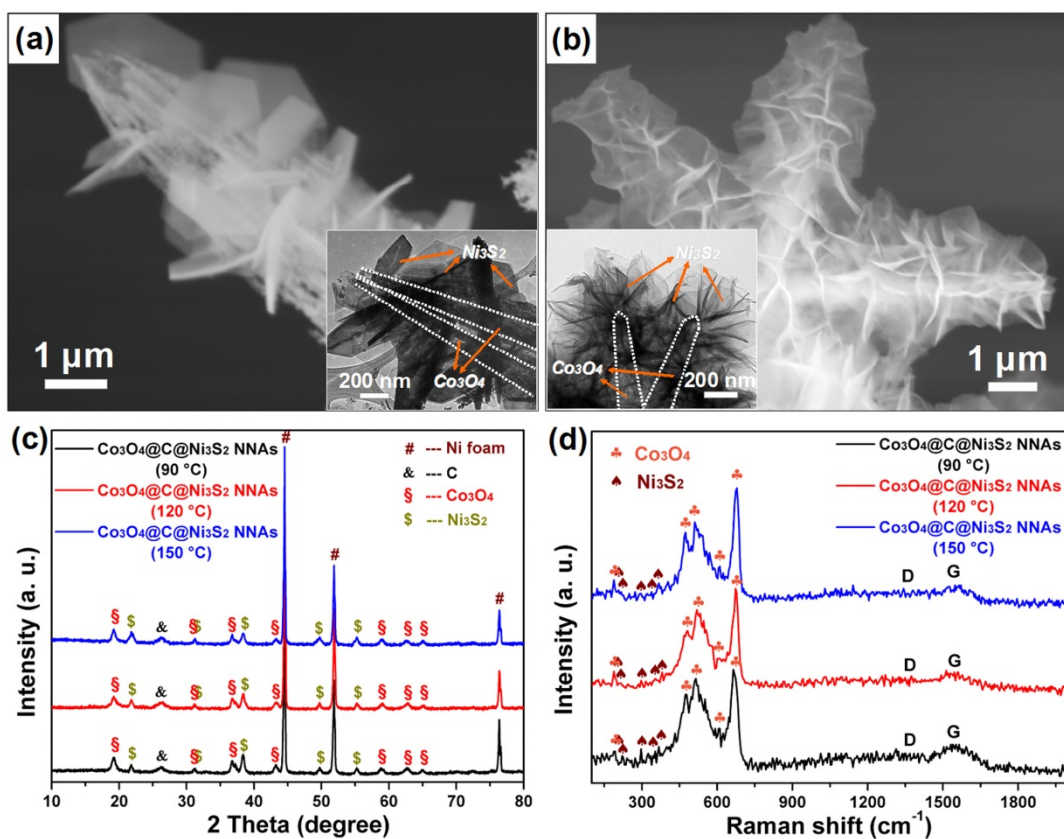

**Figure S3** (a) SEM images of the  $\text{Co}_3\text{O}_4@\text{C}@\text{Ni}_3\text{S}_2$  NNAs obtained at  $90^\circ\text{C}$  of growth, and TEM image of a  $\text{Co}_3\text{O}_4@\text{C}@\text{Ni}_3\text{S}_2$  NNAs was shown in the insets of (a); (b) SEM images of the  $\text{Co}_3\text{O}_4@\text{C}@\text{Ni}_3\text{S}_2$  NNAs obtained at  $150^\circ\text{C}$  of growth, and TEM image of a  $\text{Co}_3\text{O}_4@\text{C}@\text{Ni}_3\text{S}_2$  NNAs was shown in the insets of (b); (c) XRD patterns and (d) Raman spectra of the  $\text{Co}_3\text{O}_4@\text{C}@\text{Ni}_3\text{S}_2$  NNAs obtained with the same reaction stages except that different reaction temperatures in the second hydrothermal synthesis process:  $90^\circ\text{C}$ ,  $120^\circ\text{C}$  and  $150^\circ\text{C}$ .

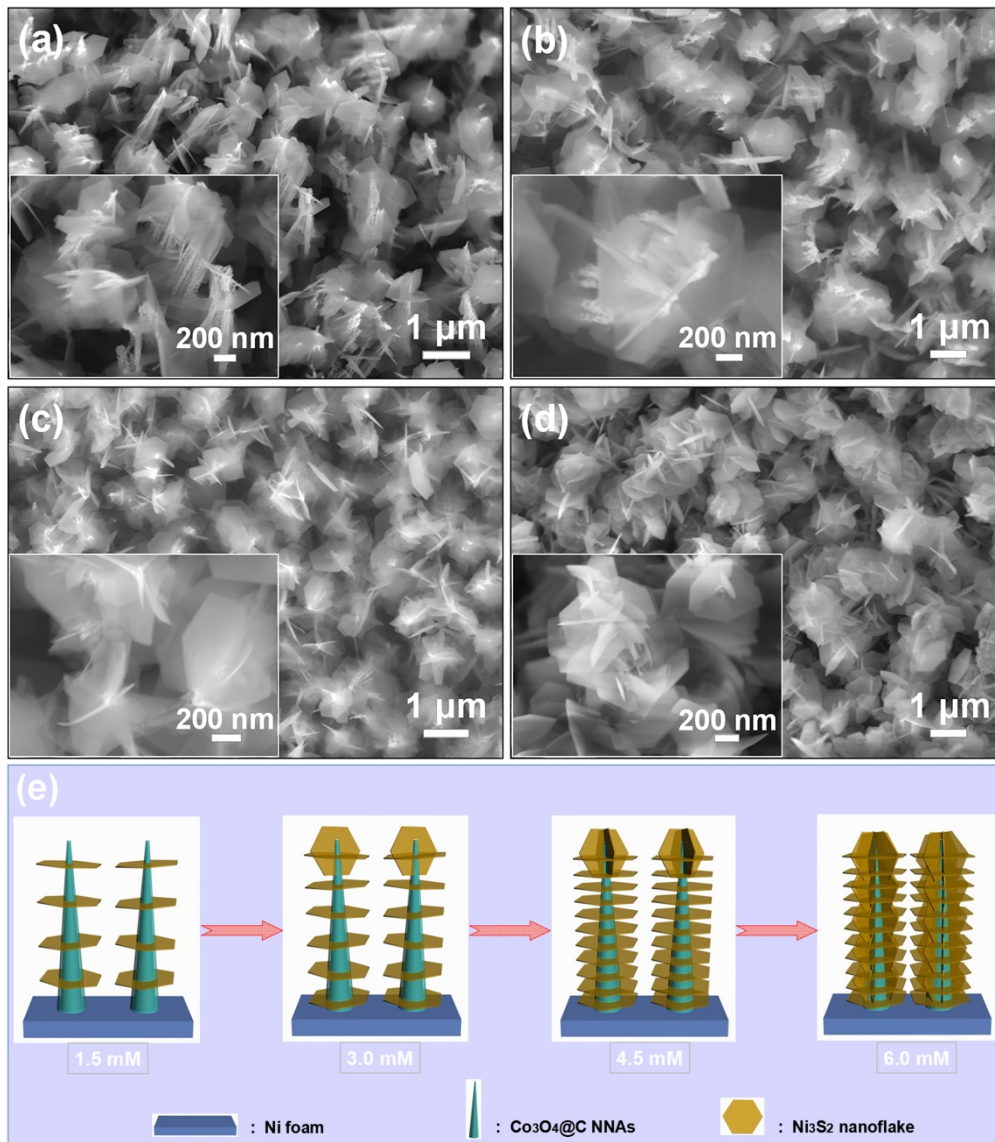

**Figure S4** SEM images of the  $\text{Co}_3\text{O}_4@@\text{C}@\text{Ni}_3\text{S}_2$  NNAs obtained with the same reaction stages except that different concentrations of aqueous mix solution ( $\text{Ni}(\text{NO}_3)_2$  and thiourea) immersed in the second hydrothermal synthesis process: (a) 1.5 mM, (b) 3.0 mM, (c) 4.5 mM, (d) 6.0 mM; (e) Proposed mechanism for the effect of aqueous mix solution ( $\text{Ni}(\text{NO}_3)_2$  and thiourea) on morphology construction.

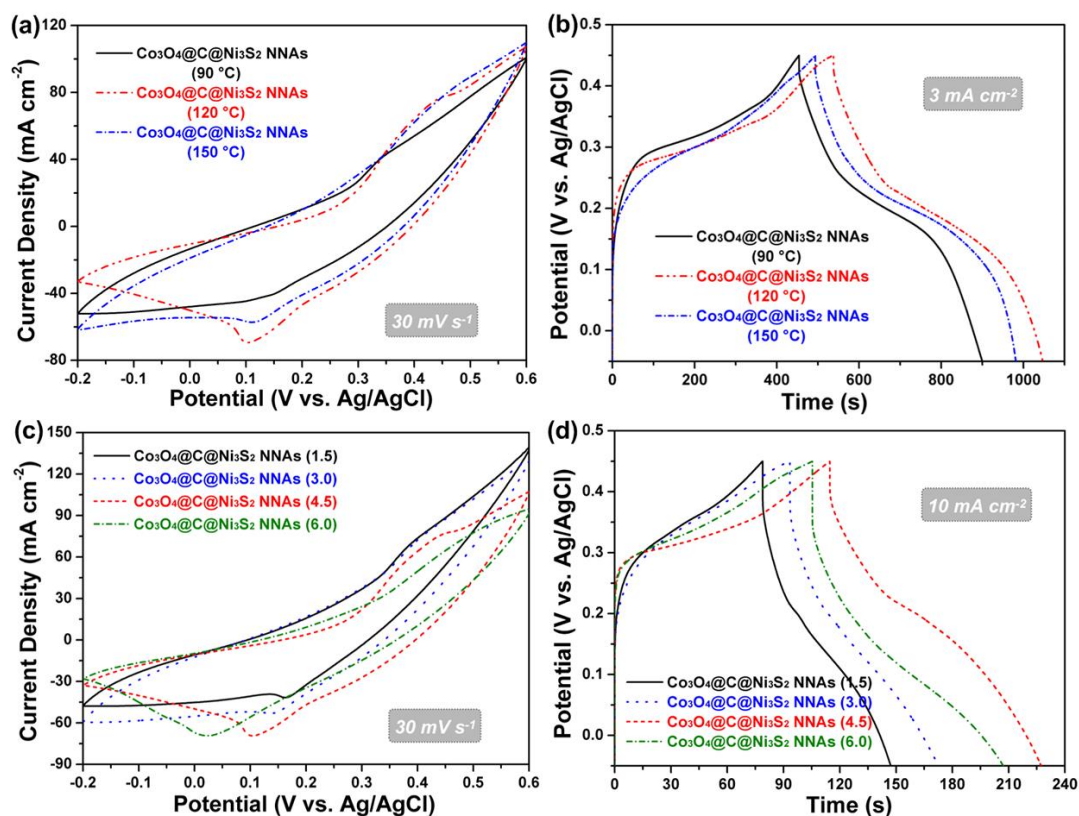

**Figure S5** (a) CV and (b) galvanostatic charge-discharge curves of the  $\text{Co}_3\text{O}_4@\text{C}@\text{Ni}_3\text{S}_2$  nanostructure arrays prepared different reaction temperatures in the second hydrothermal synthesis process, e. g. 90 °C (black curve), 120 °C (blue curve) and 150 °C (red curve); (c) CV and (d) galvanostatic charge-discharge curves of the  $\text{Co}_3\text{O}_4@\text{C}@\text{Ni}_3\text{S}_2$  nanostructure arrays prepared various concentrations (e. g. 1.5 mM, 3.0 mM, 4.5 mM and 6.0 mM) of AMS at 120 °C in the second hydrothermal synthesis process.

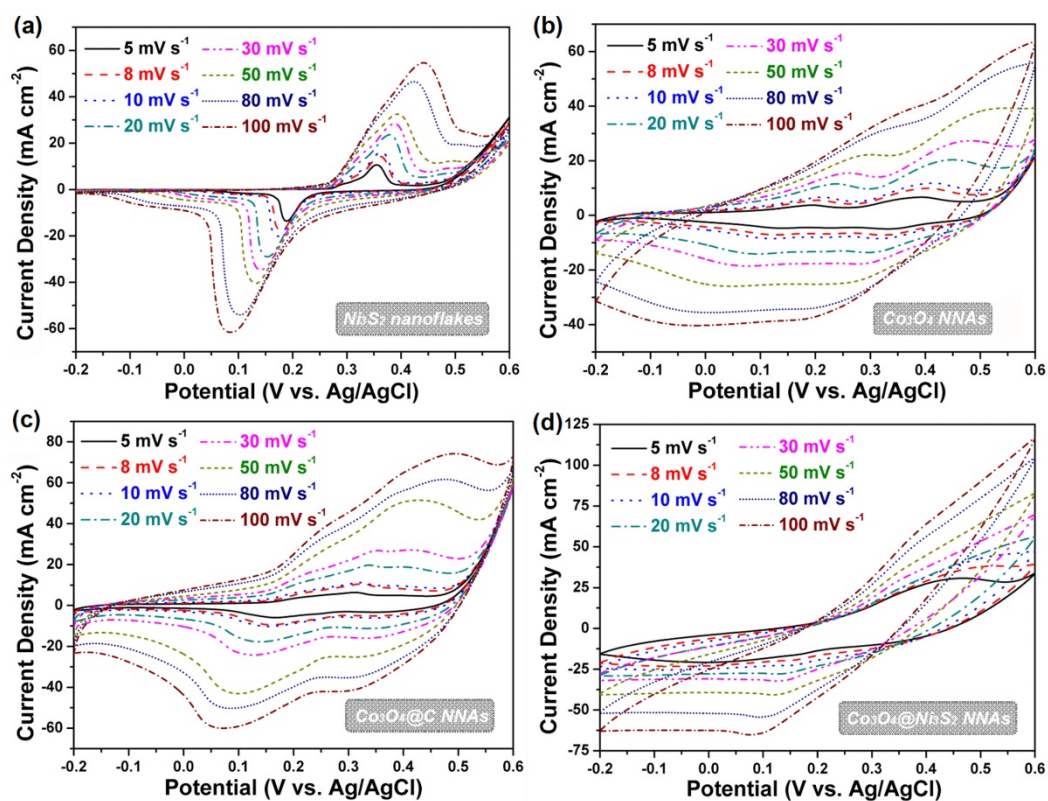

**Figure S6** CV curves at different scan rates ranging from 5 to 100 mV s<sup>-1</sup> of (a) the pure Ni<sub>3</sub>S<sub>2</sub> nanoflakes, (b) bare Co<sub>3</sub>O<sub>4</sub> nanoneedle arrays, (c) carbon-coating Co<sub>3</sub>O<sub>4</sub> core-shell nanoneedle arrays, and (d) heterogeneous Co<sub>3</sub>O<sub>4</sub>@Ni<sub>3</sub>S<sub>2</sub> core-shell nanoneedle arrays.

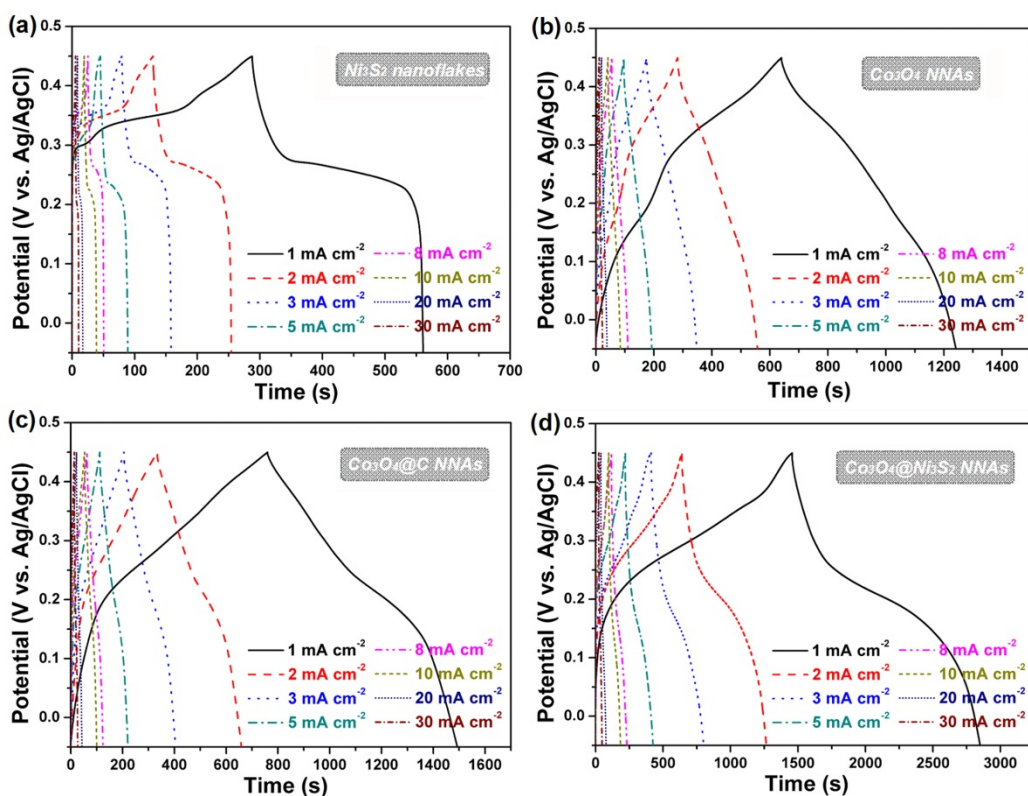

**Figure S7** Galvanostatic charge-discharge curves at different scan rates ranging from 1 to 30 mA cm<sup>-2</sup> of the (a) pure Ni<sub>3</sub>S<sub>2</sub> nanoflakes, (b) bare Co<sub>3</sub>O<sub>4</sub> nanoneedle arrays, (c) carbon-coating Co<sub>3</sub>O<sub>4</sub> core-shell nanoneedle arrays, and (d) heterogeneous Co<sub>3</sub>O<sub>4</sub>@Ni<sub>3</sub>S<sub>2</sub> core-shell nanoneedle arrays.



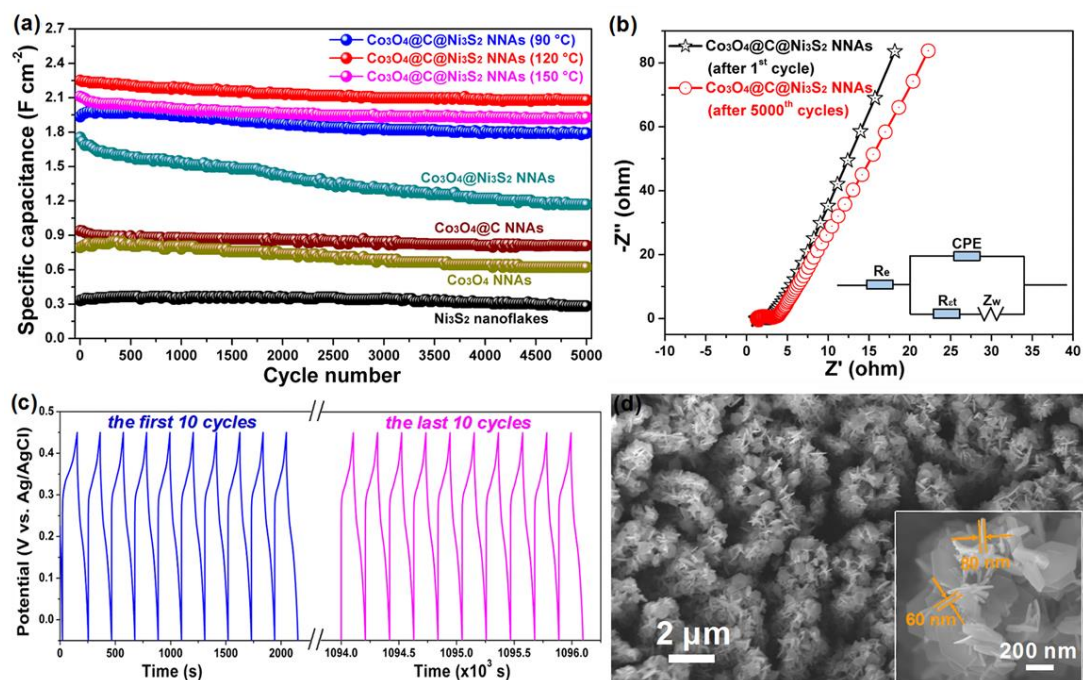

**Figure S8** (a) Cycling performance of the  $\text{Co}_3\text{O}_4@\text{C}@\text{Ni}_3\text{S}_2$  nanostructure arrays electrodes prepared at different reaction temperatures in the second hydrothermal synthesis process (5000 cycles), compared to  $\text{Ni}_3\text{S}_2$  nanoflakes,  $\text{Co}_3\text{O}_4@\text{NNAs}$ ,  $\text{Co}_3\text{O}_4@\text{C NNAs}$  and  $\text{Co}_3\text{O}_4@\text{Ni}_3\text{S}_2$  NNAs electrodes; (b) Equivalent circuit and electrochemical impedance spectra of the  $\text{Co}_3\text{O}_4@\text{C}@\text{Ni}_3\text{S}_2$  NNAs prepared at 120 °C after the first and 5000th cycles; (c) Charge-discharge curves of the first and the last 10 cycles at 10  $\text{mA cm}^{-2}$  during 5000 cycles for the  $\text{Co}_3\text{O}_4@\text{C}@\text{Ni}_3\text{S}_2$  NNAs synthesized at 120 °C hydrothermal reaction, respectively; (d) Typical SEM image of the  $\text{Co}_3\text{O}_4@\text{C}@\text{Ni}_3\text{S}_2$  NNAs prepared at 120 °C after 5000 cycles.

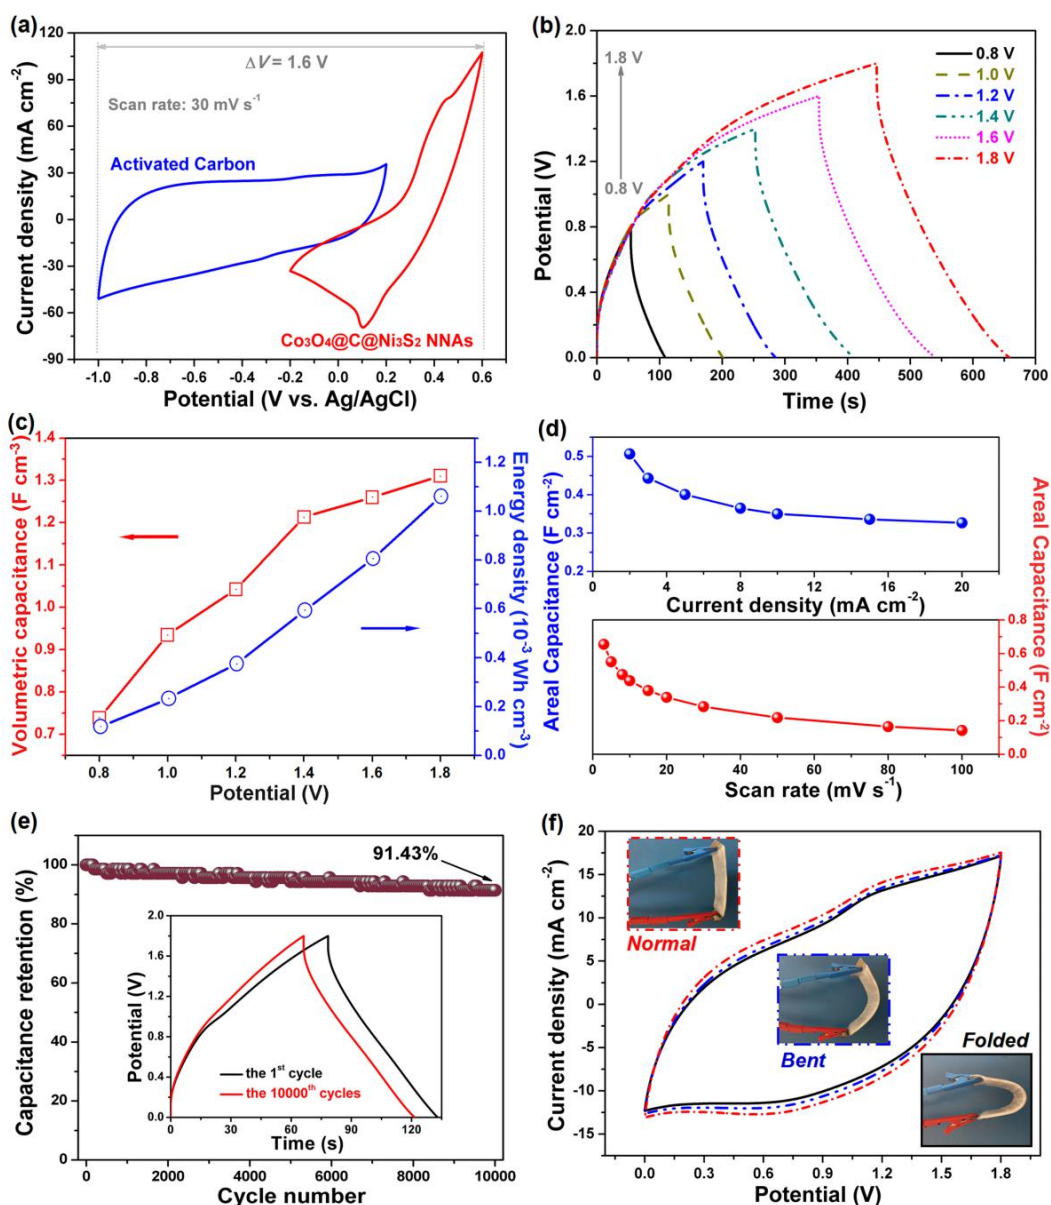

**Figure S9** (a) The comparison of CV curves of the  $\text{Co}_3\text{O}_4@\text{C}@\text{Ni}_3\text{S}_2$  NNAs composite and the activated carbon electrodes in  $-0.2$  to  $0.6$  V and  $-1.0$  to  $0.2$  V potential windows at a scan rate of  $30 \text{ mV s}^{-1}$ ; (b) Galvanostatic discharge-charge curves collected at different potential windows for the  $\text{Co}_3\text{O}_4@\text{C}@\text{Ni}_3\text{S}_2//\text{AC}$  ASC device ( $3 \text{ mA cm}^{-2}$ ); (c) Volumetric capacitance calculated from CV and discharge curves as a function of potential window for the  $\text{Co}_3\text{O}_4@\text{C}@\text{Ni}_3\text{S}_2//\text{AC}$  ASC device; (d) Areal capacitance and capacitance retention of  $\text{Co}_3\text{O}_4@\text{C}@\text{Ni}_3\text{S}_2//\text{AC}$  ASC device calculated from the CV curves as a function of scan rate and the galvanostatic charge-discharge curves as a function of current density, respectively; (e) Cycling performance of ASC devices collected at a scan rate of  $10 \text{ mA cm}^{-2}$  for 10000 cycles in gel (KOH/PVA) electrolyte, and the inset is charge-discharge curves of the 1<sup>st</sup> and 10000<sup>th</sup> cycles for our device; (f) CV curves collected at a scan rate of  $30 \text{ mV s}^{-1}$  for the  $\text{Co}_3\text{O}_4@\text{C}@\text{Ni}_3\text{S}_2//\text{AC}$  ASC device under normal, bent, and folded conditions, and insets are the device pictures under test conditions.

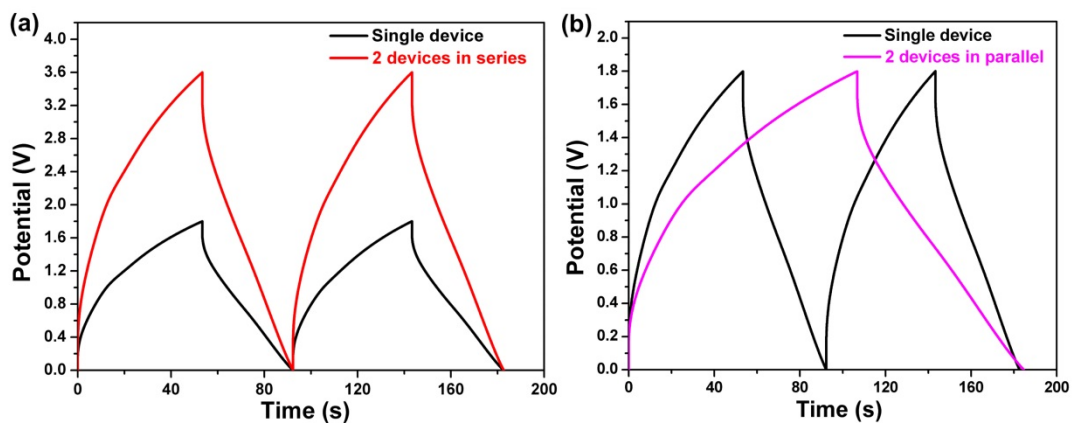

**Figure S10** Galvanostatic charge-discharge curves at  $10 \text{ mA cm}^{-2}$  of a single solid-state supercapacitor (black curve) and two supercapacitors in (a) series (red curve) and (b) parallel (pink curve).
